# Supplementary material for: Effects of Inorganic Carbon Limitation on the Metabolome of the Synechocystis sp. PCC 6803 Mutant Defective in glnB Encoding the Central Regulator PII of Cyanobacterial C/N Acclimation
Source: Metabolites. 2014 Apr 22;4(2):232–47. doi: 10.3390/metabo4020232 (PMC4101504; doi:10.3390/metabo4020232)
Supplement: Supplementary File 1 — Supplementary XLSX (XLSX, 240 KB) [file metabolites-04-00232-s001.xlsx]

## Sheet: Tabelle2
Metabolite					Analyte															Normalized data [IS-1 OD750-1]
																				WT_A_P1_24h_HC	WT_A_P2_24h_HC	WT_A_P3_24h_HC	WT_B_P1_24h_HC	WT_B_P2_24h_HC	WT_B_P3_24h_HC	WT_C_P1_24h_HC	WT_C_P2_24h_HC	WT_C_P3_24h_HC	WT_A_P1_3h_LC	WT_A_P2_3h_LC	WT_A_P3_3h_LC	WT_B_P1_3h_LC	WT_B_P2_3h_LC	WT_C_P2_3h_LC	WT_C_P3_3h_LC	WT_A_P1_24h_LC	WT_A_P2_24h_LC	WT_A_P3_24h_LC	WT_B_P1_24h_LC	WT_B_P2_24h_LC	WT_B_P3_24h_LC	WT_C_P1_24h_LC	WT_C_P2_24h_LC	WT_C_P3_24h_LC	ΔglnB_A_P1_24h_HC	ΔglnB_A_P2_24h_HC	ΔglnB_A_P3_24h_HC	ΔglnB_B_P1_24h_HC	ΔglnB_B_P2_24h_HC
Name	MPIMP-ID	Sum Formula	KEGG-ID [preferred]	CAS-ID [preferred]	Derivate	MPIMP-ID	Time Expected	Cluster_Time	Time Deviation	Cluster_Size	Matching Fragment Count	Match Value	Time_Group	Cluster_Number	Spectrum	Sample_Value_Count	Max_Sample_Value_Count_Groups	Avg_Intensity	Cluster_Text	13122mo_6	13122mo_66	13122mo_30	13122mo_42	13122mo_54	13127mo_10	13127mo_21	13127mo_32	13127mo_44	13122mo_10	13122mo_22	13122mo_34	13122mo_46	13122mo_58	13127mo_36	13127mo_48	13122mo_62	13122mo_26	13122mo_38	13122mo_50	13127mo_6	13127mo_17	13127mo_28	13127mo_40	13127mo_52	13122mo_8	13122mo_20	13122mo_32	13122mo_44	13122mo_56
Acids
Benzoate**	M000347	C7H6O2	C00180	65-85-0	Benzoic acid, (1TMS)	A128003-101	1251.31	1250.52	-0.0631338	4	4	991	25	4441	105:7178 135:3605 179:6520 180:1039	115	100	36.3562	4441@1250.52	1.20465	1.02974	1.07986	1.28713	1.384	1.40114	1.29312	1.16019	1.21425	1.35823	1.33069	0.950097	1.52029	1.18294	0.968547	0.960342	0.731021	1.18092	1.0034	1.29127	1.31837	1.21656	1.5178	1.04234	2.24047	1.51064	1.63074	1.18453	1.88253	1.37634
2-oxo-Glutarate	M000571	C5H6O5	C00026	328-50-7	Glutaric acid, 2-oxo- (1MEOX) (2TMS) MP	A158004-101	1572.85	1571.43	-0.090282	11	11	912	76	374	70:632 112:1634 127:1016 128:936 202:1153 229:1226 230:780 288:1279 289:968 304:1232 305:1112	75	100	3.98722	374@1571.43	0.0743803	0.0528985	0.0755079	0.136886	0.0949651	0.095228	0.0580503	0.0824129	0.0604931	0.0306029	0.0921309	0.0293785	0.0676601	0.0535389	0.114995	0.102375	0.0220305	0.037003	0.0350003	0.0522684	0.0598975	0.0386847	0.0338062	0.0289443	0.0383886
Glycolate	M000886	C2H4O3	C00160	79-14-1	Glycolic acid (2TMS)	A106002-101	1061.93	1062.25	0.0301338	5	4	972	4	1809	161:2745 176:569 177:6156 205:6145 206:1168	115	100	10.1938	1809@1062.25	0.217092	0.198259	0.22811	0.239077	0.263106	0.326943	0.293408	0.29725	0.302195	0.248839	0.311613	0.223166	0.3938	0.315875	1.09843	1.05229	0.105695	0.178776	0.234604	0.249468	0.332205	0.260379	0.306658	0.29112	0.32394	0.203969	0.275007	0.224084	0.250265	0.237673
Isocitrate/Citrate	M000608	C6H8O7	C00311	320-77-4	Isocitric acid (4TMS)	A182003-101	1805.4	1806.81	0.078099	12	12	987	121	411	246:55151 247:18953 248:4704 249:1188 265:2442 266:1605 267:975 319:53101 320:30274 321:13728 322:4488 392:1307	109	100	33.8954	411@1806.81	1.52973	1.01833	1.09484	1.26157	1.67336	1.26436	1.31695	1.14165	1.27218	1.47333	1.02474	1.23229	1.12345	0.955406	1.10512	1.09736	0.478131	0.946844	0.852364	0.758259	0.957138	0.735958	0.803149	0.813666	1.00162	2.29858	1.87479	2.42343	1.96919	2.19386
Lactate**	M000100	C3H6O3	C00186	79-33-4	Lactic acid (2TMS)	A105001-101	1044.41	1043.8	-0.0584062	6	6	996	3	4799	118:9155 134:1337 192:3965 193:1339 219:5429 220:1094	115	100	43.4623	4799@1043.80	1.71708	1.1154	1.22781	2.23195	1.8073	2.14018	1.39334	1.47103	0.985938	1.23632	2.25974	1.67769	2.41106	1.63247	1.81757	0.884365	0.639356	1.33801	1.54783	1.75721	1.99988	1.13308	1.20276	0.89255	0.832648	1.5634	2.51131	2.33716	1.96104	1.46184
Malate	M000065	C4H6O5	C00149	97-67-6	Malic acid (3TMS)	A149001-101	1478.99	1478.03	-0.0649092	4	4	921	61	192	245:3805 246:1959 265:2598 307:2837	110	100	1.40584	192@1478.03	0.0164252	0.0116191	0.00780274	0.00977448	0.0132227	0.0102975	0.0100623	0.0108142	0.0097358	0.0104085	0.0114831	0.00882208	0.00916053	0.0055647			0.00540892	0.0136723	0.011976	0.0153889	0.0161792	0.0108763	0.0100719	0.00998852	0.0138454	0.00936482	0.0105424	0.0133058	0.00561183	0.0101181
Amino Acids
beta-Alanine	M000027	C3H7NO2	C00099	107-95-9	Alanine, beta- (3TMS)	A144001-101	1424.05	1422.56	-0.104631	3	3	987	52	6779	174:2059 175:674 290:661	91	100	25.0962	6779@1422.56	0.142422	0.119588	0.108508	0.150189	0.164766							0.0967629			0.120649	0.124715	0.343303	0.584069	0.738157	0.54686	0.565951	0.593101	0.802121	0.711451	0.778891	1.53716	1.89414	2.0243	1.50083	1.90916
Arginine*	M000835	C6H14N4O2	C00062	74-79-3	Acid (Amino)	A183001-111		1815.44		1			122	531	256:2555	73	100	13.3657	531@1815.44	0.0693656	0.0516288	0.0798702				0.0623017	0.0788676	0.154287	0.188831	0.274379	0.393147	0.293961	0.218869	0.218327	0.0232428							0.0532522	0.0831214	0.133894
Aspartate	M000033	C4H7NO4	C00049	56-84-8	Aspartic acid (3TMS)	A152002-101	1510.94	1511.08	0.00926576	9	9	996	66	3493	100:33556 202:7361 204:2058 216:2959 218:13814 219:2798 232:65547 233:13555 234:5810	112	100	16.3567	3493@1511.08	0.834481	0.607685	0.50067	0.703939	0.936577	0.711664	0.817128	0.774621	0.797037	0.206063	0.208892	0.219166	0.162228	0.114531	0.456037	0.401296	0.114673	0.217108	0.213999	0.364953	0.350694	0.379892	0.239735	0.221979	0.310502	0.713919	0.752283	0.907793	0.645746	0.863816
2-amino-Butyrate	M000228	C4H9NO2	NA	1492-24-6	Butanoic acid, 2-amino- (2TMS)	A117002-101	1160.82	1159.63	-0.102514	4	4	947	11	7189	204:704 205:402 218:545 232:372	45	100	35.8475	7189@1159.63											0.46821	0.359772	0.520874	0.444042			0.635673	0.875388	0.990029	1.70025	2.4526	1.87224	2.42362	2.28878	2.50868
Glutamine (Pyroglutamic acid, Glutamic acid)***	M000037	C5H7NO3	C02238	NA	Pyroglutamic acid (2TMS)	A153002-101	1521.72	1527.39	0.372605	20	20	998	67	271	70:7540 71:4393 82:1986 87:2903 110:1446 112:6016 113:2242 114:3050 133:13255 134:2065 140:8347 141:3203 154:3254 157:53860 228:1462 230:29037 231:7604 258:28066 259:6184 260:2657	115	100	20.1613	271@1527.39	1.28375	1.10205	0.906681	1.36951	1.55635	1.23348	1.43668	1.31492	1.41062	0.948544	0.805908	0.90226	0.878848	0.700094	1.31612	1.23253	0.296453	0.46653	0.523557	0.54144	0.589144	0.494272	0.587261	0.58764	0.74736	0.485067	0.521205	0.572998	0.552304	0.658258
Glutamate	M000036	C5H9NO4	C00025	56-86-0	Glutamic acid (2TMS)	A154002-101	1528.2	1529.98	0.116477	8	8	999	67	269	84:92402 160:1316 173:1747 175:4689 176:1818 187:1219 248:1501 276:3864	113	100	16.8619	269@1529.98	1.66985	0.946159	0.992711	1.4788	1.60759	1.18701	1.02561	0.731365	0.700144	1.28789	1.42826	1.03737	1.05085	0.675544	0.811459	0.636062	0.335059	0.685598	0.529924	0.558822	0.878649	0.511736	0.557187	0.395763	0.1786	0.196721	0.245841	0.39733	0.309599	0.452851
Glycine	M000031	C2H5NO2	C00037	56-40-6	Glycine (3TMS)	A133001-101	1302.5	1302.63	0.00998081	4	4	999	30	6769	174:81601 175:15719 248:13131 276:4250	115	100	18.3586	6769@1302.63	0.250682	0.179855	0.267715	0.431811	0.477886	0.354371	0.345853	0.378776	0.316165	0.727825	0.723557	0.556547	0.668335	0.528258	1.84544	1.90671	0.10709	0.380839	0.287611	0.348729	0.428736	0.332025	0.431886	0.353998	0.393614	0.341023	0.485499	0.42337	0.387326	0.396164
Isoleucine	M000017	C6H13NO2	C00407	73-32-5	Isoleucine (2TMS)	A132002-101	1286.69	1288.42	0.134454	6	6	997	27	5290	128:490 158:7826 159:1221 218:1738 220:403 260:351	111	100	13.8739	5290@1288.42	0.181508	0.15558	0.158388	0.320542	0.263081	0.321244	0.303616	0.292802	0.25829	0.464389	0.549489	0.363739	0.524127	0.408587	0.480375	0.474911	0.122812	0.155263	0.206084	0.28221	0.42092	0.38373	0.384363	0.373799	0.455086	0.175308	0.243427	0.19122	0.195459	0.147916
Lysine	M000014	C6H14N2O2	C00047	56-87-1	Lysine (4TMS)	A192003-101	1913.61	1910.24	-0.176107	3	3	997	134	2430	128:6018 317:4943 318:1778	112	100	15.636	2430@1910.24	0.122461	0.127643	0.126983	0.186335	0.221786	0.147485	0.146345	0.149306	0.159647	0.239496	0.194892	0.218168	0.281297	0.219339	0.16162	0.179025	0.156194	0.173794	0.324885	0.51266	0.360902	0.366534	0.620388	0.625612	0.972217	0.0530227	0.0866428	0.138373	0.0918031	0.125444
Ornithine (Arginine, Citrulline)***	M000028	C5H12N2O2	C00077	70-26-8	Ornithine (4TMS)	A182002-101	1806.67	1806.39	-0.0154981	4	4	998	121	5096	126:1429 146:2827 172:3160 421:985	110	100	15.6903	5096@1806.39	0.310192	0.226365	0.27703	0.328062	0.395863	0.339868	0.314902	0.295487	0.305181	0.506606	0.487978	0.597663	0.72801	0.526318	0.488936	0.406091	0.105124	0.194703	0.189293	0.175283	0.214054	0.176565	0.192646	0.215688	0.277265	0.402403	0.396089	0.411487	0.375978	0.381115
Serine	M000015	C3H7NO3	C00065	56-45-1	Serine (3TMS)	A138001-101	1351.33	1351.04	-0.0214603	6	6	998	37	4641	204:25820 205:5233 206:2428 218:17204 219:3582 220:1570	112	100	8.73951	4641@1351.04	0.116844	0.0992388	0.0970387	0.161785	0.144894	0.121568	0.133247	0.125504	0.109864	0.166552	0.204477	0.16968	0.139596	0.104795	0.171577	0.1676	0.0733618	0.205253	0.328597	0.271945	0.278191	0.244991	0.289242	0.266136	0.331563	0.155729	0.163753	0.197351	0.136243	0.153602
Threonine	M000016	C4H9NO3	C00188	72-19-5	Threonine (3TMS)	A140001-101	1377.23	1376.6	-0.045744	13	13	997	46	1858	102:1800 118:2028 218:13154 219:12361 220:2936 248:366 276:372 291:3264 292:2193 293:1061 320:698 321:397 322:323	112	100	18.6672	1858@1376.60	0.314354	0.217599	0.212716	0.339954	0.357376	0.323495	0.381219	0.346722	0.332079	1.34393	1.24433	1.14711	1.19276	0.839078	1.52897	1.36871	0.174082	0.368676	0.540224	0.417039	0.457647	0.385809	0.496444	0.446923	0.56945	0.239601	0.264238	0.331579	0.235225	0.275514
Tyrosine	M000035	C9H11NO3	C00082	60-18-4	Tyrosine (3TMS)	A194002-101	1934.12	1932.71	-0.0729014	3	3	999	137	3277	218:17679 219:3624 280:1561	111	100	10.8541	3277@1932.71	0.0982914	0.111285	0.0858801	0.102306	0.148543	0.0843403	0.118027	0.105666	0.111043	0.151919	0.151641	0.176597	0.188097	0.140756	0.179716	0.171666	0.0723545	0.111716	0.143973	0.219556	0.175342	0.16833	0.264364	0.292123	0.401948	0.0644043	0.0790568	0.107678	0.0742094	0.0762697
Fatty Acids
Decanoic acid	M000478	C10H20O2	C01571	334-48-5	Decanoic acid (1TMS)	A147004-101	1456.08	1454.84	-0.0851602	3	3	996	57	1989	117:3888 129:1712 132:1508	115	100	25.2005	1989@1454.84	0.944771	0.753826	0.814993	0.939895	1.01351	0.82426	0.723729	0.838129	0.741423	0.957047	0.857769	0.842212	0.826351	0.69501	0.718528	0.598397	0.431706	0.775175	0.763578	0.814333	0.756997	0.612908	0.664449	0.681427	0.833685	0.984832	0.905484	1.13394	0.821846	1.08534
Hexadecanoic acid**	M000483	C16H32O2	C00249	57-10-3	Hexadecanoic acid (1TMS)	A205001-101	2046.19	2045.95	-0.0117291	41	41	996	154	960	70:3879 72:6668 76:11540 81:6964 83:7587 84:4415 85:2919 87:1447 89:4211 91:1312 95:5069 97:5348 98:4892 99:2688 101:2110 109:1550 111:2212 112:1349 116:10011 117:140555 118:13889 119:5866 125:828 129:61569 130:7986 132:68269 133:12484 134:3268 145:36223 146:4872 159:2935 171:2177 185:2784 187:2344 201:4734 202:1045 227:869 269:1424 285:1363 314:7734 315:2148	115	100	37.5175	960@2045.95	1.35326	1.09216	1.21636	1.29063	1.34541	1.40227	1.30045	1.24512	1.12999	1.17346	1.46867	1.15306	1.465	1.04011	1.13978	1.07849	0.666669	1.14427	1.2126	1.28126	1.48159	1.18055	1.14349	1.08111	1.32387	1.52865	1.48825	1.4403	1.20997	1.48933
Nonanoic acid	M000461	C9H18O2	C01601	112-05-0	Nonanoic acid (1TMS)	A138003-101	1360.69	1358.54	-0.158008	3	3	996	37	4809	117:4837 132:1654 215:2265	115	100	22.5382	4809@1358.54	0.83995	0.799098	0.737234	0.927683	1.03836	0.927145	0.774339	0.798101	0.778151	0.915477	0.845471	0.766882	0.855473	0.693682	0.732057	0.591581	0.372111	0.67965	1.07223	0.775623	0.740961	0.628329	0.756531	0.688205	1.07245	0.89327	0.866646	1.05082	0.900357	1.06183
Octadecanoic acid**	M000485	C18H36O2	C01530	57-11-4	Octadecanoic acid (1TMS)	A225002-101	2243.48	2243.1	-0.016938	43	43	995	170	1002	72:9728 76:15953 77:11310 81:10655 83:12780 84:6819 85:5292 86:1999 87:2087 89:6801 91:1915 95:7600 96:1627 97:9065 99:4103 109:2554 111:3832 112:2208 116:14033 117:198984 118:19875 119:8417 123:1191 125:1381 129:91336 130:11972 132:106123 133:22361 135:1733 145:60981 146:8309 159:4680 171:3353 173:1235 185:4501 187:3692 201:8324 202:1791 227:1351 241:1327 297:1821 313:1814 314:1756	115	100	38.1269	1002@2243.10	1.36421	1.16193	1.20982	1.378	1.40697	1.48376	1.3847	1.2376	1.10731	1.19795	1.59399	1.24883	1.36812	1.04636	1.14079	1.0006	0.679098	1.25367	1.20779	1.20136	1.53887	1.25246	1.11632	1.06312	1.2643	1.52184	1.4809	1.53553	1.26358	1.58185
N- Compounds
Ethanolamine**	M000096	C2H7NO	C00189	NA	Ethanolamine (3TMS)	A128002-101	1260.11	1259.29	-0.0650737	25	25	998	27	178	72:18536 85:6233 86:198615 87:22361 88:12177 98:1746 100:195446 101:28452 102:15322 113:4739 114:25226 115:11334 116:13300 130:40464 131:33144 132:10476 133:72769 144:5906 146:5040 158:7080 159:2382 160:1758 172:12279 173:3667 188:8253	115	100	55.341	178@1259.29	2.05435	1.71208	1.91676	2.18779	1.99302	2.50823	2.24959	2.01032	2.03164	1.92491	2.24184	1.65694	2.54155	1.95489	1.86784	1.68852	0.968195	1.67073	1.7401	1.56848	2.33185	2.02771	1.9559	1.79072	2.18271	2.20654	2.01152	1.86405	2.08032	1.9341
Phosphates
Fructose-6-phosphate	M000510	C6H13O9P	C00085	643-13-0	Fructose-6-phosphate (1MEOX) (6TMS) MP	A232002-101	2292.48	2293.68	0.0523451	7	6	905	173	3146	116:1456 135:442 245:342 269:298 285:337 291:421 300:930	115	100	27.4189	3146@2293.68	1.75021	1.03583	1.24318	0.981572	1.58704	1.27863	1.32812	1.1211	1.31335	0.682484	1.93413	0.537438	0.388558	0.349441	0.352629	0.289407	0.492861	0.828259	0.919749	0.677037	0.581035	0.82909	1.09295	1.25042	1.16641	2.10271	1.83342	2.36052	1.54943	1.72607
Glucose-6-phosphate	M000513	C6H13O9P	C00092	56-73-5	Glucose-6-phosphate (1MEOX) (6TMS) MP	A233002-101	2307.34	2306.77	-0.0247038	73	58	977	173	3148	107:322 138:362 140:316 160:4949 161:1236 162:488 163:470 168:349 173:415 175:341 177:350 180:295 187:327 188:290 190:380 195:494 196:347 197:339 204:1140 206:335 209:351 214:337 216:474 225:701 226:339 228:528 229:467 233:302 234:324 241:343 243:494 246:371 249:338 253:356 255:308 256:319 259:316 268:337 270:354 274:405 275:295 284:349 291:326 301:1216 302:483 303:304 305:338 314:710 315:2926 31…	113	100	24.6238	3148@2306.77	2.2773	1.5708	1.57859	1.15685	2.46242	1.7582	1.67857	1.5486	1.73455	0.721456	0.674905	0.636243	0.513065	0.496618	0.254435	0.194255	0.214809	0.408955	0.477247	0.536879	0.671485	0.525432	0.317251	0.393404	0.350039	1.47997	1.67564	2.00827	1.24999	1.48139
Gluconate-6-phosphate	M000077	C6H13O10P	C00345	53411-70-4	Gluconic acid-6-phosphate (7TMS)	A244001-101	2417.35	2416.93	-0.0173744	6	6	982	181	3568	247:431 259:357 299:1871 315:1067 316:495 387:1407	112	100	9.61429	3568@2416.93	0.597892	0.286395	0.369641	0.549819	0.454507	0.448591	0.610314	0.481226	0.485416	0.179323	0.217667	0.103553	0.148844	0.0782772	0.179782	0.153983	0.0416591	0.0546434	0.0734049	0.0714276	0.0610111	0.0865099	0.0505889	0.0569933	0.0579116	1.53107	1.10452	1.48357	0.997661	1.25682
Glycerate-2-phosphate	M000505	NA	NA	NA	Glyceric acid-2-phosphate (4TMS)	A179005-101	1766.25	1767.21	0.0543524	5	5	996	115	5461	135:498 211:1190 299:1792 315:963 369:901	107	100	29.4881	5461@1767.21	0.677758	0.499597	0.485911	0.87408	0.795272	0.576067	0.695007	0.6403	0.693532	1.00723	1.14463	1.02351	0.861079	0.650618	1.2874	1.1485	0.785015	1.40582	1.1589	1.29913	1.63906	1.43571	1.10171	1.02033	1.47576	0.480295	0.389498	0.452166	0.356674	0.455939
Glycerate-3-phosphate	M000105	C3H7O7P	C00197	820-11-1	Glyceric acid-3-phosphate (4TMS)	A181003-101	1791.68	1793.44	0.0982318	40	40	989	119	590	72:6752 102:3029 115:2733 119:2252 133:20008 134:2913 143:8641 144:1408 145:1254 207:6009 208:1459 217:15058 218:3238 219:2138 225:4644 226:1108 227:35976 228:5833 229:3210 243:1416 269:1061 283:1119 285:3410 299:38338 300:12080 301:6474 302:1499 315:15548 316:4289 317:2915 341:3144 358:8469 359:4376 360:999 387:12192 388:5061 389:3507 390:1335 460:3575 461:1898	114	100	36.5855	590@1793.44	1.37948	1.00798	1.02248	1.27418	1.60599	1.18954	1.35578	1.26238	1.40488	1.13428	1.36115	1.12132	0.967299	0.642276	1.69816	1.46919	0.872705	1.47113	1.33723	1.65759	2.14357	1.76638	1.24874	1.29212	1.71016	1.43214	1.0384	1.38462	0.977422	1.21656
Glycerol-3-phosphate	M000328	C3H9O6P	C00093	29849-82-9	Glycerol-3-phosphate (4TMS)	A177002-101	1750.51	1750.18	-0.0188516	6	6	991	114	9270	299:1180 300:417 301:320 315:363 357:899 358:349	108	100	32.7695	9270@1750.18	1.51688	1.1629	1.07569	1.40423	2.02187	1.28502	1.44685	1.11587	1.48466	1.00977	0.812518	0.877458	0.985761	0.619495	0.723311	0.903108	0.493236	1.10428	1.09036	1.23686	1.29442	0.906681	0.787336	0.763586	1.04141	1.77242	1.60735	2.00867	1.25217	1.68556
Glycolate-2-phosphate	M000668	NA	NA	NA	Glycolic acid-2-phosphate (3TMS)	A157011-101	1590.23	1590.77	0.0339574	12	12	963	80	3385	179:381 195:815 196:326 283:335 285:329 302:326 314:355 328:1426 329:555 358:1493 359:863 360:322	95	100	27.5455	3385@1590.77	0.277964	0.205347		0.520216		0.452467				2.29779	1.67686	2.01476	2.0991	1.76238	1.30625	1.26975	0.617368	0.781815	0.978584	0.846895	0.910241	0.737778	1.00921	1.03065	1.21052
Phosphoric acid	M000075	H3O4P	C00009	7664-38-2	Phosphoric acid (3TMS)	A129001-101	1262.42	1266.16	0.296256	47	33	996	27	1890	77:45653 91:11462 92:1892 93:3388 107:17501 108:2105 109:5554 115:60779 121:37080 122:5290 123:14950 135:103182 136:12119 137:48137 139:4746 165:19741 179:17718 180:5982 181:42795 189:26947 191:89395 192:22761 193:108283 194:22654 195:27624 196:5942 197:7595 207:113793 208:25921 209:19911 210:7417 211:172074 212:27618 213:15243 223:2999 239:2222 252:1145 253:6489 255:4994 267:4780 270:4452 271:23…	115	100	21.8101	1890@1266.16	0.46649	0.752209	0.479071	0.653355	0.759723	0.576421	0.643184	0.587948	0.670826	0.730819	0.746907	0.730773	1.00849	0.740907	0.756905	0.743434	0.565858	0.704141	0.697507	0.620902	0.679678	0.665371	0.834471	0.832274	0.960572	0.454407	0.488497	0.579093	0.600592	0.579476
Phosphoenolpyruvate	M000745	NA	NA	NA	Phosphoenolpyruvic acid (3TMS)	A159005-101	1593.37	1593.45	0.0050208	5	5	994	80	8091	225:1123 243:612 369:3232 370:1075 371:602	107	100	26.8171	8091@1593.45	0.610178	0.361498	0.345908	0.643936	0.637525	0.586377	0.61273	0.454375	0.49211	1.24041	1.12859	1.1763	0.910589	0.739859	1.48212	1.2218	0.668285	1.30544	1.0723	1.02744	1.41153	1.1673	0.940568	0.967337	1.3882	0.312818	0.217518	0.303295	0.267824	0.25734
Ribulose-5-phosphate	M000769	NA	NA	NA	Ribulose-5-phosphate (1MEOX) (5TMS) BP	A211015-101	2087.72	2090.58	0.136992	3	3	998	161	3584	357:6430 358:2257 359:1179	78	100	35.3604	3584@2090.58										2.44504	1.9003	1.53581	1.98625	1.70102	0.906723	0.911189	0.672714	1.03352	1.31091	1.2479	1.35011	0.925109	1.82124	1.65213	1.66635	0.0590593		0.053591
Sugars
Glucose**	M000040	C6H12O6	C00031	50-99-7	Glucose (1MEOX) (5TMS) MP	A189002-101	1880.5	1878.01	-0.132412	3	3	997	130	6252	160:5339 205:6694 319:5088	113	100	1.88836	6252@1878.01	0.0261121	0.0246697	0.0198922	0.024208	0.0369155	0.0240286	0.0204145	0.0268975	0.0215917	0.0153987	0.0196194	0.016162	0.0189119	0.0124481	0.0134883	0.012718	0.00843358	0.0175595	0.0183119	0.0186158	0.0191921	0.0166275	0.0178496	0.0155466	0.0186914	0.0211922	0.0307206	0.0281879	0.0213624	0.0226451
Glucopyranose	M999999	C6H12O6	C00031	50-99-7	Glucopyranose, D- (5TMS)	A198006-101	1959.24	1962.71	0.177109	5	5	999	140	6520	191:4450 192:811 204:8795 205:1797 217:1675	113	100	28.7456	6520@1962.71	0.773592	0.79013	0.761558	0.936178	0.982354	1.00279	0.949916	1.03686	0.993854	0.832861	1.22744	0.834446	1.09193	0.910137	0.929873	0.902181	0.456993	0.729195	0.824242	0.893084	0.902092	0.728081	0.93763	0.794181	1.06363	0.694516	0.913241	0.985883	1.80505	0.799688
Ribose	M000582	C5H10O5	C08353	50-69-1	Ribose (1MEOX) (4TMS) MP	A168002-101	1665.99	1666.3	0.0186076	4	4	981	92	4218	104:556 160:474 277:330 309:291	84	100	24.1645	4218@1666.30	0.424768	0.362467	0.229232								0.352588	0.366998	0.308059	0.254055			0.249212	0.403764	0.465755				0.617912	0.515362	0.75975	1.08835	1.15648	1.40197	1.06165	1.60876
Sucrose	M000044	C12H22O11	C00089	57-50-1	Sucrose (8TMS)	A264001-101	2622.87	2622.33	-0.0205881	14	14	983	203	1451	101:1771 113:1476 170:2081 192:1562 203:1580 221:1643 230:2050 244:2072 272:2088 320:1600 331:1579 363:5574 364:1828 439:1623	114	100	2.04656	1451@2622.33	0.0327646	0.0185472	0.0208605	0.0413204	0.0372376	0.0301961	0.0242797	0.0215311	0.0224454	0.0263732	0.0299119	0.0209713	0.0253121	0.0181876	0.0240356	0.0234684	0.0149781	0.0250723	0.0269991	0.0250484	0.0259073	0.0251669	0.0150347	0.0129245	0.0172967	0.0137051	0.0144642	0.0213209	0.358026	0.0145328
Polyhydroxy Acids
Erythronic acid	M999999	C4H8O5	NA	15667-21-7	Erythronic acid (4TMS)	A154001-101	1528.56	1530.04	0.0968232	3	3	994	67	7826	205:1028 220:1024 292:1341	110	100	27.3146	7826@1530.04	1.27595	1.03367	0.894025	1.21061	1.64822	1.19703	1.28177	1.22611	1.22886	1.23189	1.14461	1.06302	1.08038	0.856239	1.35794	1.25545	0.61185	1.05922	1.12478	1.09231	1.2269	1.02737	1.17654	1.04643	1.21784	0.631106	0.807882	0.885015	0.559766	0.844477
Galactonate	M000596	C6H12O7	C00880	576-36-3	Galactonic acid (6TMS)	A199002-101	1980.32	1981.7	0.0696857	3	3	981	144	7850	205:1355 292:988 305:418	112	100	29.3697	7850@1981.70	0.804351	0.715333	0.662176	0.938106	1.29897	0.800255	1.15535	0.876108	1.0289	1.0649	1.0881	0.848127	1.17704	0.719995	1.18011	1.00023	0.623081	0.823723	0.897659	0.943738	1.02326	0.878265	0.938601	0.922387	1.13048	1.09955	1.10976	1.31333	1.02355	1.11729
Galactonate-1,4-lactone**	M000639	C6H10O6	C03383	322-32-8	Galactonic acid-1,4-lactone (4TMS)	A189003-101	1874.95	1874.94	-0.000533348	8	7	885	130	2264	116:756 151:349 159:354 165:331 175:368 201:868 231:661 246:1183	106	100	11.2162	2264@1874.94	0.490957	0.269532	0.0603167	0.0814159	0.0623248	0.0775602	0.048779	0.0771177	0.0639082	0.063854	0.54822	0.414965	0.776275	0.0425234	0.0587954	0.04596	0.272432	0.456504	0.0634045		0.080739	1.05735		0.0555044	0.871371	0.0555598		0.407605	0.0932865	0.246258
Gluconate-1,5-lactone**	M000638	C6H10O6	C00198	90-80-2	Gluconic acid-1,5-lactone (4TMS)	A189008-101	1871.9	1873.21	0.0699824	10	10	974	130	2255	81:916 103:4054 117:3029 133:3265 204:2111 219:1249 221:938 243:957 319:3255 320:1102	113	100	20.9808	2255@1873.21	0.798081	0.584481	0.693022	0.726286	0.698538	0.793534	0.613248	0.722639	0.661184	0.671904	0.727156	0.646115	0.768757	0.58045	0.623016	0.601349	0.358775	0.629377	0.721782	0.567755	0.772098	0.58249	0.662946	0.570304	0.749826	0.496301	0.586356	0.785881	0.44868	0.572721
Polyols
Erythritol	M000054	C4H10O4	C00503	149-32-6	Erythritol (4TMS)	A150002-101	1493.27	1492.58	-0.0462073	3	3	994	63	4622	116:388 191:339 204:353	63	100	36.149	4622@1492.58	1.24083	0.920862	0.990921	0.981574	1.60129					1.13457	0.888755	1.07806	1.09963	0.930376			0.643568	0.81429	0.733578	0.968875	1.33885			0.931749		1.15457		1.15447
Glycerol**	M000053	C3H8O3	C00116	56-81-5	Glycerol (3TMS)	A129003-101	1262.29	1264.6	0.183001	18	18	997	27	1892	88:12253 101:74883 104:40158 113:8746 118:47240 129:66545 130:11083 177:40716 203:24991 204:48811 205:347166 206:67220 217:17969 218:123680 219:26285 220:10950 293:8534 294:2749	115	100	31.8657	1892@1264.60	1.22528	1.08524	1.13053	1.08246	1.10167	1.07901	1.00437	0.835762	0.776258	1.55422	1.85926	1.11386	1.68917	1.17052	1.01336	0.984363	0.767424	0.897366	0.740482	0.908953	0.873865	0.702688	0.817809	0.576454	0.807584	0.981759	1.18033	0.965386	0.795918	0.734295
Sorbitol	M000055	C6H14O6	C00794	50-70-4	Sorbitol (6TMS)	A193001-101	1919.43	1920.49	0.0552247	52	52	983	137	747	89:33128 101:22370 111:1766 113:5558 117:109785 127:2090 129:46658 130:10024 141:1887 143:10077 158:6750 159:6486 169:3738 175:11854 183:5894 189:42376 190:14018 201:2075 204:35120 205:169882 215:2143 217:128918 218:33119 219:26782 229:17140 230:7327 231:17145 232:6610 243:2862 255:6873 256:3277 257:3359 259:4645 277:8448 278:7417 291:7143 305:7179 306:4838 307:29278 319:122172 320:40812 321:2116…	114	100	20.6981	747@1920.49	0.208358	0.401028	0.413573	0.379196	0.398614	0.352554	0.301709	0.331203	0.302468	0.367155	0.724578	0.803624	0.756273	0.769498	0.659885	0.634337	0.820266	0.778613	0.443329	0.348949	0.324453	0.329011	0.275348	0.324845	0.297114	0.352165	0.553513	0.456759	0.498269	0.465273
Internal Standard (Retention Time)
Decane	M000515	C10H22	NA	124-18-5	Decane, n-	A100003-101	1000	1000.1	0.01	14	11	947	1	1	70:60968 71:147007 72:7228 83:3896 84:29289 85:77839 86:5647 98:15171 99:16137 106:11711 112:4450 121:57259 122:5170 142:11603	115	100	40.6438	1@1000.10	1.25378	0.760259	1.20962	1.49702	1.29875	2.17911	1.82226	1.64858	1.66519	1.4016	1.51081	0.997355	1.90238	1.83221	1.62175	1.42998	0.490064	0.998425	1.07984	1.05021	2.21322	1.70206	1.67545	1.28931	1.66387	1.44674	1.52868	1.13924	1.3895	1.12482
Dodecane	M000424	C12H26	C08374	112-40-3	Dodecane	A120001-101	1200	1199.99	-0.000833333	18	18	997	18	157	70:57672 71:224921 72:11503 82:3275 83:10369 84:25098 85:95928 86:6180 97:4061 98:17370 99:15165 112:8963 113:8372 126:3580 127:5469 140:1458 141:2603 170:9149	115	100	40.2912	157@1199.99	1.30138	0.919239	1.25311	1.44436	1.21979	2.01397	1.8153	1.55413	1.48956	1.35636	1.56922	1.04661	1.73983	1.38459	1.42595	1.27766	0.568235	1.01635	1.1769	1.03349	1.96021	1.64962	1.53368	1.4097	1.65018	1.48512	1.49356	1.17321	1.31203	1.20492
Docosane	M000550	C22H46	NA	629-97-0	Docosane, n-	A220001-101	2200	2199.99	-0.000454545	31	31	984	169	1089	70:35839 71:205015 72:10458 81:3536 82:7708 83:24657 85:104143 86:7023 96:3604 97:16320 99:27765 100:2772 110:1700 111:6740 112:6306 113:14266 125:2783 126:4538 127:9112 140:3421 141:6205 154:2651 155:4353 168:1996 169:3181 182:1507 183:2425 196:1099 197:1882 225:1214 239:1034	115	100	41.0073	1089@2199.99	1.38269	1.26741	1.23273	1.47405	1.45823	1.58185	1.52583	1.29222	1.22761	1.30685	1.75552	1.24706	1.55301	1.16273	1.15144	1.03278	0.758918	1.20291	1.20557	1.17434	1.71635	1.38491	1.25648	1.13991	1.33859	1.6245	1.46338	1.60958	1.35758	1.65136
Dotriacontane	M000567	C32H66	NA	544-85-4	Dotriacontane, n-	A320001-101	3199.99	3199.99	0	16	16	986	276	1769	70:12147 71:69008 72:3550 82:3763 83:13219 84:5420 85:35343 86:2512 97:9619 98:3414 100:1066 111:4037 112:2263 126:1635 140:1260 154:957	115	100	47.9542	1769@3199.99	1.43676	1.5452	1.86397	2.00137	1.80168	1.84631	1.81307	1.61913	1.48837	1.64763	2.44391	1.43323	2.24166	1.63586	1.40887	1.19895	0.831845	1.34048	1.6912	1.42875	1.94188	1.49753	1.47845	1.38591	1.69857	1.78828	2.42019	1.45445	1.85189	1.88979
Hexatriacontane	M000570	C36H74	NA	630-06-8	Hexatriacontane, n-	A360001-101	3599.99	3599.98	-0.000277779	20	20	992	311	1640	70:19552 71:110215 72:5624 81:3350 82:6648 83:23477 84:8813 85:56741 86:3978 95:1463 97:17616 98:5599 100:1686 111:7488 112:3692 126:2680 140:2049 154:1562 168:1297 182:1046	115	100	46.6838	1640@3599.98	1.22095	1.2333	1.74453	1.67548	1.36904	2.03848	1.93266	2.94078	2.36616	1.49803	2.22856	1.21865	1.784	1.34375	1.74393	1.24007	0.556583	1.10149	1.49556	1.13211	2.89984	1.53987	1.62049	1.62314	1.52787	1.5896	1.90858	1.26624	1.53988	1.31425
Nodecane	M000543	C19H40	NA	629-92-5	Nonadecane	A190001-101	1900.01	1899.99	-0.00105263	31	31	988	131	696	70:40533 71:227364 72:11127 81:2971 82:7035 83:21770 84:17280 85:112478 86:7405 96:3181 97:13883 98:10936 99:28644 100:2684 111:5659 112:7092 113:14289 114:1716 125:2171 126:5096 127:8855 140:3721 141:5888 154:2624 155:3975 168:1950 169:2910 182:1393 183:2253 196:939 197:1773	115	100	30.3326	696@1899.99	1.02833	0.89712	0.895837	0.974193	1.07408	1.2196	1.15551	1.08256	0.991364	0.915209	1.16312	0.86373	1.02324	0.808812	0.950906	0.834314	0.521778	0.831647	0.836261	0.854708	1.29567	1.00973	0.976715	0.902743	1.12216	1.16693	0.999899	1.04613	0.839922	1.16329
Octadecane	M000539	C18H38	NA	593-45-3	Octadecane, n-	A180008-101	1799.99	1799.99	0	28	28	985	121	405	70:35129 71:192378 72:9668 81:2395 82:5599 83:17016 84:14950 85:93985 86:6249 96:2472 97:10683 98:9442 99:23495 100:2221 111:4260 112:6123 113:11399 125:1601 126:4353 127:7037 140:3137 141:4616 154:2161 155:3160 168:1620 169:2364 182:1123 183:1861	115	100	33.4298	405@1799.99	1.12179	0.987539	0.960425	1.09581	1.08159	1.3705	1.2034	1.18818	1.07514	1.08847	1.2349	0.969304	1.15614	0.890512	1.0451	0.938419	0.562698	0.956784	0.961472	0.930452	1.38478	1.1022	1.09092	0.999935	1.18662	1.34242	1.15386	1.13657	0.986946	1.30986
Octacosane	M000563	C28H58	NA	630-02-4	Octacosane, n-	A280001-101	2800.02	2800.03	0.00035714	18	18	994	228	1523	96:3046 99:17924 110:1414 113:9378 114:1260 125:2587 127:6100 128:1020 139:1034 141:4287 155:3058 169:2349 183:1783 197:1424 211:1127 225:933 239:785 253:707	115	100	39.4125	1523@2800.03	1.47313	1.21199	1.24562	1.46446	1.37352	1.41956	1.41577	1.11733	1.10329	1.42825	2.02637	1.15809	1.71067	1.2402	1.01634	0.941796	0.674172	1.19896	1.18911	1.22306	1.39042	1.19054	1.10375	1.01312	1.22862	1.6898	1.5917	1.42694	1.31618	1.79511
Pentadecane	M000535	C15H32	C08388	629-62-9	Pentadecane, n-	A150001-101	1500	1500	0	23	23	993	64	217	70:44881 71:220859 72:10981 81:1861 82:5211 83:14942 84:18984 85:103735 86:7208 97:8639 98:12424 99:22113 111:3435 112:7908 113:9746 126:5249 127:6131 140:3359 141:4589 154:1951 155:3136 168:1067 169:1830	115	100	32.9773	217@1500.00	1.13822	0.903201	0.937985	1.07773	1.09187	1.26287	1.18016	1.1418	1.0255	1.1031	1.1677	1.00542	1.12329	0.892644	1.05661	0.89294	0.569083	0.906526	0.956379	0.91359	1.28756	1.06063	1.11199	0.975621	1.15886	1.23711	1.05163	1.18948	0.940743	1.32622
MSTs
Phosphoric acid monomethyl ester	M000507	NA	NA	NA	Phosphoric acid monomethyl ester (2TMS)	A119001-101	1167.37	1166.11	-0.107935	5	5	999	13	4889	135:1610 195:1029 211:1858 241:12549 242:2306	111	100	33.4606	4889@1166.11	0.822196	0.806575	0.766363	0.908602	1.0591	1.23833	1.02725	0.990936	1.02342	1.31221	1.64856	1.50819	2.40975	1.58491	1.54391	1.66835	0.444092	0.909866	0.917185	0.935569	1.16251	1.04232	1.20455	1.28401	1.28566	0.840645	1.15809	1.22568	1.01104	1.05413
similar to Glycerolaldopyranosid	NA	NA	NA	NA	similar to Glycerolaldopyranosid (6TMS)	A231002-101	2298.8	2298.69	-0.00478511	23	15	992	173	3151	161:415 163:326 177:486 189:654 192:521 204:12495 205:2697 206:1351 219:1006 220:503 227:666 229:296 231:621 233:288 244:334 245:340 249:338 305:600 319:356 338:749 339:497 361:710 362:348	112	100	21.8093	3151@2298.69	1.10307	0.63764	0.707432	0.649808	1.1666	0.844386	0.839671	0.773867	0.829379	0.433904	0.393874	0.3051	0.300843	0.280629	0.12608	0.130594	0.688188	1.25243	1.36925	1.1637	1.43916	1.20277	1.83917	1.88626	2.11916	0.765806	0.910652	0.942684	0.657005	0.667452
NA	NA	NA	NA	NA	NA	A142003-101	1401.04	1401.07	0.00214127	35	26	990	51	2066	84:1266 88:3204 89:3621 98:1348 100:4239 101:2237 102:7133 103:38884 113:1587 114:3473 115:2682 116:3084 118:1175 128:15635 129:26831 130:5466 131:4293 132:2248 133:8552 142:2734 143:1332 144:29445 145:5581 146:1743 203:10339 204:4474 205:8992 206:3859 217:3319 218:1766 233:1224 234:86806 235:18881 236:7888 237:1151	115	100	23.7194	2066@1401.07	0.771352	0.790784	0.670346	0.869901	1.03379	0.764717	0.804761	0.798092	0.820863	0.596456	0.700544	0.694305	0.79753	0.665556	0.767251	0.729882	0.502718	1.24283	1.07301	0.892684	1.02355	0.810569	0.894881	0.842141	0.860273	0.744221	0.673412	0.882523	0.782969	1.07036
NA	NA	NA	NA	NA	NA	A147005-101	1462.03	1460.7	-0.0909694	6	6	999	57	1965	104:6054 236:20146 237:4201 238:1860 338:2233 339:794	111	100	19.2293	1965@1460.70	0.283065	1.14226	0.436197	0.598622	0.729852	0.355393	0.409329	0.714845	0.867824	0.230679	0.509473	0.446458	0.927774	0.700134	0.863537	0.834163	0.561627	0.337814	0.510308	0.908622	0.21189	0.454505	0.600302	0.901677	0.879855	0.177622	0.378979	0.55146	0.581162	0.984917
NA	NA	NA	NA	NA	NA	A184003-101	1820.79	1820.3	-0.0269114	10	10	992	122	525	117:5035 156:1408 170:919 171:392 173:762 198:719 202:655 233:859 234:399 404:412	112	100	16.9136	525@1820.30	0.521122	0.417109	0.395874	0.480616	0.608242	0.485669	0.556129	0.578186	0.552348	0.65983	0.781297	0.67771	0.80817	0.567553	0.712973	0.691443	0.0846958	0.109102	0.137523	0.164722	0.169134	0.114235	0.173529	0.168258	0.202445	0.404129	0.533286	0.569349	0.348135	0.491475
NA	NA	NA	NA	NA	NA	A184005-101	1828.43	1830.37	0.106102	9	9	970	124	2836	116:538 159:409 189:469 203:412 219:390 226:568 231:484 233:460 314:298	88	100	25.6228	2836@1830.37	0.889159	0.604229	0.67889	0.848489	0.91199	0.768577	0.809534	0.753906	0.771508	1.33146	1.17362	1.00954	1.06602	0.851176	1.17418	1.07706	0.131947	0.233261								0.613636		0.719624	0.543707	0.612836
NA	NA	NA	NA	NA	NA	A203004-101	2012.18	2012.89	0.0352851	6	6	996	149	915	169:2166 211:1087 243:2929 244:731 258:1546 315:1147	112	100	35.9863	915@2012.89	1.52784	0.798866	0.989039	1.15068	1.27257	1.32626	1.19597	1.14232	1.08805	1.40383	1.49028	1.21383	1.28598	0.867846	1.22156	1.08184	0.72876	1.44522	1.53487	1.17135	1.68127	1.24789	1.31479	1.16247	1.50179	1.47262	1.39927	1.4567	0.930405	1.06569
NA	NA	NA	NA	NA	NA	A311002-101	3098.96	3091.11	-0.253311	5	5	995	263	2478	103:3311 191:1159 204:10100 205:2199 217:2439	110	100	15.5185	2478@3091.11	0.18831	0.221022	0.204512	0.284501	0.29755	0.200944	0.221573	0.182911	0.157316	0.216583	0.318892	0.20655	0.2964	0.218195	0.170816	0.145575	0.297459	0.486263	0.605007	0.591777	0.557638	0.427094	0.500277	0.44556	0.541935	0.231748	0.30618	0.252991	0.28842	0.287388
Reagent (Contamination)
Diethyleneglycol	M000805	C4H10O3	NA	111-46-6	Diethylenglycol (2TMS)	A127003-101	1235.42	1235.15	-0.0218549	36	29	994	22	164	70:6728 71:10345 72:44234 76:13125 77:16990 85:3058 87:30269 88:62097 89:22659 90:2526 91:1475 99:2776 101:122718 102:16704 103:177693 104:16449 105:9501 115:9391 116:269468 117:540639 118:69127 119:35918 120:2791 131:8587 132:1676 133:36258 134:5021 135:3246 145:23798 146:2803 191:20291 192:4429 193:1901 207:4530 235:8523 236:1746	115	100	42.9453	164@1235.15	1.36842	1.32518	1.43424	1.58593	1.48724	1.90367	1.80904	1.58096	1.50073	1.39225	1.59678	1.23954	1.84487	1.42783	1.42837	1.30049	0.69638	1.25619	1.26337	1.20246	1.86469	1.55217	1.54916	1.36881	1.68858	1.52132	1.55644	1.41572	1.4826	1.45445
2-hydroxy-Pyridine	M000413	NA	NA	NA	Pyridine, 2-hydroxy- (1TMS)	A105003-101	1031.31	1029.31	-0.193928	10	10	999	1	2934	83:2372 92:1519 95:1978 98:1173 99:1421 122:11823 123:1550 136:4894 137:1811 152:141126	115	100	47.0168	2934@1029.31	1.32769	1.07219	1.24062	1.65674	1.83363	2.10642	2.01897	1.866	2.00051	1.38056	1.8637	1.26974	2.41092	2.14448	2.01676	1.90278	0.625186	1.04491	1.25011	1.31585	1.84442	1.5957	1.84879	1.83776	2.1142	1.31301	1.45929	1.33612	1.75633	1.5833
N-tri(hydroxymethyl)methyl-Taurine**	M001206	NA	NA	NA	Taurine, N-tri(hydroxymethyl)methyl- (4TMS)	A209015-101	2098.65	2105.06	0.305434	9	5	955	162	1107	94:22231 110:8560 178:3462 240:4328 257:2124 285:3572 340:2064 342:1964 362:3406	112	100	27.5048	1107@2105.06	1.34153	0.949358	1.29354	1.06528	1.59203	0.777547	0.54784	0.444971	0.361217	0.606088	0.483971	0.970839	0.960909	0.562133	0.555502	0.357104	0.512553	1.2282	0.980151	1.15559	1.34202	0.894549	0.723341	0.952372	0.720425	1.26779	0.951176	0.994113	1.09268	0.688057
NA	M000870	NA	NA	NA	Siloxane	A104001-101	1021.01	1017.13	-0.380016	6	6	998	1	7490	207:31742 208:6833 209:3962 295:5001 296:1561 297:954	115	100	49.2761	7490@1017.13	0.951707	1.22093	1.51397	1.87789	2.26882	1.81546	1.73321	2.37687	2.35421	1.10284	1.70023	1.36646	2.91275	3.1184	2.03483	2.25579	0.559587	1.13217	1.57867	1.70402	1.38987	1.69147	1.93447	2.16653	2.53323	1.06156	1.52962	1.53172	1.85199	2.05048
NA	NA	NA	NA	NA	NA114002 (classified unknown)	A114002-101	1129.96	1129.62	-0.0300896	29	28	997	7	92	71:18894 72:211931 86:150912 88:38592 90:11801 91:6174 99:7422 102:31301 103:100017 104:12774 113:3150 115:19851 118:10720 119:23598 121:1951 129:1961 133:312378 134:47167 135:24460 136:2318 146:93701 150:6020 160:69588 161:10852 163:10597 190:23205 221:24114 222:10856 223:1920	115	100	25.9056	92@1129.62	0.87668	0.838299	0.80579	0.913244	0.974087	0.806963	0.887331	0.885919	0.811739	0.923131	1.05769	0.771453	1.14772	0.93327	0.81316	0.626562	0.470959	0.833225	0.87558	0.854924	1.02208	0.817063	0.749827	0.777187	1.10063	0.847155	0.892722	0.751552	0.834012	1.19712
NA	M000870	NA	NA	NA	similar to Cyclohexasiloxane, dodecamethyl	A131003-101	1293.78	1301.35	0.585107	4	4	986	30	2621	325:607 342:655 343:524 429:658	107	100	9.43397	2621@1301.35	0.144594	1.77765	0.171572	0.194168	0.271682	0.190919	0.175008	0.237352	0.163545	0.211776	0.160549	0.151241	0.210228	0.164942	0.167815	0.146349	0.719235	0.150515	0.137941	0.135615	0.242314	0.190725	0.191251	0.155537	0.156341	0.173775	0.215498	0.163853	0.190812	0.278304
NAs
D116201**	NA	NA	NA	NA	D116201	A116012-101	1161.89	1161.59	-0.02582	9	9	994	12	3938	99:1313 126:1180 140:1242 146:1272 174:10358 175:1953 176:918 214:4793 215:1150	115	100	54.3189	3938@1161.59	1.79751	1.33752	1.81417	2.14562	2.02057	2.98692	2.48145	2.24356	2.27483	1.86151	2.26429	1.61125	2.65789	2.05423	2.12646	1.87241	0.757415	1.64247	1.62952	1.6919	2.77212	2.38637	2.26373	1.97673	2.44727	2.0852	2.10312	1.78487	1.90538	1.71188
D260482**	NA	NA	NA	NA	D260482	A260006-101	2604.1	2603.23	-0.0334089	13	13	996	202	1482	83:1300 84:1283 86:2465 97:850 98:1243 99:5906 103:8969 116:13214 117:5569 119:1309 145:1498 283:6511 284:1559	115	100	49.6588	1482@2603.23	1.55014	1.49443	1.64385	1.8693	1.79621	2.0259	1.81079	1.66911	1.63315	1.68115	2.23417	1.56087	2.08202	1.49046	1.61468	1.33576	0.885227	1.49993	1.54904	1.51666	1.99124	1.54647	1.57056	1.5374	1.77884	1.85488	2.00833	1.89696	1.74672	2.07113
D273330**	NA	NA	NA	NA	D273330	A273017-101	2733.48	2737.61	0.151089	8	8	997	224	4187	103:2303 118:259 129:1977 204:10061 205:2108 206:893 217:2396 361:606	111	100	44.7623	4187@2737.61	1.52946	1.54669	1.52665	1.93823	1.73823	1.63294	1.3626	1.51637	1.49394	1.44348	2.28001	1.40214	2.04241	1.58761	1.19046	1.36506	0.881247	1.34298	1.78974	1.56418	1.587	1.41349	1.48727	1.16065	1.46744	1.08922	1.53314	1.52799	1.26456	1.24091
D278931**	NA	NA	NA	NA	D278931	A278013-101	2788.7	2787.79	-0.0326317	16	16	996	227	1504	70:1063 71:3054 83:1881 84:1718 85:1325 86:3124 95:969 97:1262 98:1691 99:8069 116:18227 117:7837 118:1486 119:1736 145:1920 155:894	115	100	50.0023	1504@2787.79	1.62194	1.60288	1.67915	1.81292	2.04205	2.05151	1.93146	1.64463	1.68033	1.66768	2.45387	1.54631	2.17594	1.65679	1.56929	1.44839	0.831296	1.50051	1.62205	1.64903	2.00545	1.60531	1.51853	1.42331	1.85694	1.85187	2.19442	1.78836	1.68378	2.04727
NA145015**	NA	NA	NA	NA	NA145015	A145015-101	1455.47	1455.06	-0.0281696	13	13	976	57	1969	82:6633 87:2269 89:3602 102:4757 114:3864 155:4447 156:1281 172:5362 173:1066 174:21292 175:3921 176:1740 243:6100	115	100	30.7802	1969@1455.06	1.14587	0.840246	0.963267	1.01496	1.07426	1.07229	1.0327	1.12517	1.00516	1.03337	1.08026	0.938376	1.05422	0.810632	1.00668	0.854146	0.474652	0.824171	0.905244	0.887763	1.05387	0.918551	1.01219	0.961985	1.09368	1.20119	1.0174	1.15237	0.889511	1.21155
Unknown#bth-pae-013	NA	NA	NA	NA	Unknown#bth-pae-013	A116014-101	1158.99	1147.34	-1.00519	8	8	998	7	6693	207:2626 281:17034 282:5038 283:3083 284:686 369:3859 370:1523 371:960	115	100	50.5357	6693@1147.34	1.64416	1.25621	1.50842	1.84878	1.71978	1.96445	2.14344	1.80557	1.81011	1.60414	1.94989	1.53373	2.54445	2.24608	1.6357	1.79042	0.912041	1.62388	1.82571	1.86052	2.29299	2.02014	2.10287	1.93966	2.16618	1.68611	1.64884	1.80201	1.47062	1.78455
NA	NA	NA	NA	NA	NA	A112003-101	1122.44	1123.48	0.0926553	14	14	988	7	79	72:67921 91:1585 114:13497 118:3835 130:248920 144:47682 145:6735 146:11534 174:172373 175:24680 176:7719 188:168512 189:23229 205:1646	115	100	26.5265	79@1123.48	0.196969	1.94829	0.534857	0.916783	1.29202	0.598485	0.937828	1.09757	1.43151	0.238879	0.562826	0.529971	1.29477	1.08798	1.55813	1.28574	0.936155	0.459276	0.620467	1.05977	0.4976	0.868334	0.96641	1.37874	1.52582	0.244414	0.453925	0.591485	0.955182	1.1408
NA	NA	NA	NA	NA	NA	A122002-101	1196.07	1206.44	0.867006	21	9	709	18	2916	84:536 88:341 101:790 104:335 113:368 118:386 128:956 135:330 144:31439 145:4011 146:1642 157:360 158:362 159:388 160:419 163:413 218:5656 219:1463 220:805 221:346 247:343	115	100	9.89132	2916@1206.44	0.283716	0.193548	0.158478	0.247939	0.238069	0.274328	0.272743	0.244171	0.245292	0.0668366	0.0787641	0.0651185	0.108747	0.0919147	0.0396868	0.0365179	0.0252252	0.114342	0.0687724	0.0861327	0.153174	0.13008	0.0945253	0.0943396	0.108536	0.420745	0.438706	0.420864	0.364716	0.323124
NA	NA	NA	NA	NA	NA	A166010-101	1657.76	1658.13	0.0223193	4	4	999	91	6510	169:2609 271:5734 272:1439 273:627	110	100	26.2319	6510@1658.13	0.787605	1.0308	0.888001	1.13098	1.03072	1.06097	0.77968	1.04177	0.981112	0.797497	1.02914	0.803177	1.03319	0.888758	0.787363	0.838032	0.498946	0.794209	0.948581	0.823995	0.853648	0.675368	0.791818	0.721793	0.960965	0.624012	0.792612	1.00794	0.483641	0.849977
NA**	NA	NA	NA	NA	NA	A190021-101	1907.43	1909.01	0.082834	23	23	963	134	2372	104:14041 119:19429 120:1797 132:12224 161:2456 192:4239 207:42149 208:7904 209:3743 235:1195 248:1234 262:1458 264:2435 277:1926 289:1645 290:5363 291:1212 336:1404 367:2403 368:794 379:1611 380:4375 381:1522	113	100	30.6345	2372@1909.01	1.11547	0.928595	1.23838	1.2982	1.32818	1.39873	1.04412	1.04725	0.941555	1.121	1.14293	0.983311	1.08847	0.87821	0.783413	0.776406	0.458731	1.71725	0.98091	1.22999	1.20442	1.13973	1.02019	0.969804	1.0449	1.16003	1.16144	1.25448	0.999921	1.30423
NA	NA	NA	NA	NA	NA	A318004-101	3171.26	3168.34	-0.092077	5	5	988	273	3633	105:726 119:2206 133:2707 134:1150 177:701	60	100	61.3578	3633@3168.34	1.00993	1.55433	1.64055	2.22168	2.5236					1.473	2.04383	1.50633	2.73904	1.9838			0.820111	1.39182	1.97829							1.43355	1.95738	1.64332	2.3132	2.74009
[truncated: 140 more columns]

## Sheet: Tabelle3
Name Analyte
M000515	A100003-101-xxx	NA	1000	TRUE	VAR5	ALK	Decane, n-
M000870	A104001-101-xxx	NA	1021.01	PRED	VAR5	ALK	Siloxane
M000100	A105001-101-xxx	NA	1044.41	TRUE	VAR5	ALK	Lactic acid (2TMS)
M000413	A105003-101-xxx	NA	1031.31	TRUE	VAR5	ALK	Pyridine, 2-hydroxy- (1TMS)
M000886	A106002-101-xxx	NA	1061.93	TRUE	VAR5	ALK	Glycolic acid (2TMS)
M000000	A112003-101-xxx	NA	1122.44	TRUE	VAR5	ALK	NA
M000000	A114002-101-xxx	NA	1129.96	TRUE	VAR5	ALK	NA114002 (classified unknown)
M000000	A116012-101-xxx	NA	1161.89	TRUE	VAR5	ALK	D116201
M000000	A116014-101-xxx	NA	1158.99	PRED	VAR5	ALK	Unknown#bth-pae-013
M000228	A117002-101-xxx	NA	1160.82	TRUE	VAR5	ALK	Butanoic acid, 2-amino- (2TMS)
M000507	A119001-101-xxx	NA	1167.37	TRUE	VAR5	ALK	Phosphoric acid monomethyl ester (2TMS)
M000424	A120001-101-xxx	NA	1200	TRUE	VAR5	ALK	Dodecane
M000000	A122002-101-xxx	NA	1196.07	PRED	VAR5	ALK	NA
M000805	A127003-101-xxx	NA	1235.42	TRUE	VAR5	ALK	Diethylenglycol (2TMS)
M000096	A128002-101-xxx	NA	1260.11	TRUE	VAR5	ALK	Ethanolamine (3TMS)
M000347	A128003-101-xxx	NA	1251.31	TRUE	VAR5	ALK	Benzoic acid, (1TMS)
M000075	A129001-101-xxx	NA	1262.42	TRUE	VAR5	ALK	Phosphoric acid (3TMS)
M000053	A129003-101-xxx	NA	1262.29	TRUE	VAR5	ALK	Glycerol (3TMS)
M000870	A131003-101-xxx	NA	1293.78	PRED	VAR5	ALK	similar to Cyclohexasiloxane, dodecamethyl
M000017	A132002-101-xxx	NA	1286.69	TRUE	VAR5	ALK	Isoleucine (2TMS)
M000031	A133001-101-xxx	NA	1302.5	TRUE	VAR5	ALK	Glycine (3TMS)
M000015	A138001-101-xxx	NA	1351.33	TRUE	VAR5	ALK	Serine (3TMS)
M000461	A138003-101-xxx	NA	1360.69	TRUE	VAR5	ALK	Nonanoic acid (1TMS)
M000016	A140001-101-xxx	NA	1377.23	TRUE	VAR5	ALK	Threonine (3TMS)
M000000	A142003-101-xxx	NA	1401.04	PRED	VAR5	ALK	NA
M000027	A144001-101-xxx	NA	1424.05	TRUE	VAR5	ALK	Alanine, beta- (3TMS)
M000000	A145015-101-xxx	NA	1455.47	TRUE	VAR5	ALK	NA145015
M000478	A147004-101-xxx	NA	1456.08	TRUE	VAR5	ALK	Decanoic acid (1TMS)
M000000	A147005-101-xxx	NA	1462.03	PRED	VAR5	ALK	NA
M000065	A149001-101-xxx	NA	1478.99	TRUE	VAR5	ALK	Malic acid (3TMS)
M000535	A150001-101-xxx	NA	1500	TRUE	VAR5	ALK	Pentadecane, n-
M000054	A150002-101-xxx	NA	1493.27	TRUE	VAR5	ALK	Erythritol (4TMS)
M000033	A152002-101-xxx	NA	1510.94	TRUE	VAR5	ALK	Aspartic acid (3TMS)
M000037	A153002-101-xxx	NA	1521.72	TRUE	VAR5	ALK	Pyroglutamic acid (2TMS)
M999999	A154001-101-xxx	NA	1528.56	TRUE	VAR5	ALK	Erythronic acid (4TMS)
M000036	A154002-101-xxx	NA	1528.2	TRUE	VAR5	ALK	Glutamic acid (2TMS)
M000668	A157011-101-xxx	NA	1590.23	TRUE	VAR5	ALK	Glycolic acid-2-phosphate (3TMS)
M000571	A158004-101-xxx	NA	1572.85	TRUE	VAR5	ALK	Glutaric acid, 2-oxo- (1MEOX) (2TMS) MP
M000745	A159005-101-xxx	NA	1593.37	TRUE	VAR5	ALK	Phosphoenolpyruvic acid (3TMS)
M000000	A166010-101-xxx	NA	1657.76	PRED	VAR5	ALK	NA
M000582	A168002-101-xxx	NA	1665.99	TRUE	VAR5	ALK	Ribose (1MEOX) (4TMS) MP
M000328	A177002-101-xxx	NA	1750.51	TRUE	VAR5	ALK	Glycerol-3-phosphate (4TMS)
M000505	A179005-101-xxx	NA	1766.25	TRUE	VAR5	ALK	Glyceric acid-2-phosphate (4TMS)
M000539	A180008-101-xxx	NA	1799.99	TRUE	VAR5	ALK	Octadecane, n-
M000105	A181003-101-xxx	NA	1791.68	TRUE	VAR5	ALK	Glyceric acid-3-phosphate (4TMS)
M000028	A182002-101-xxx	NA	1806.67	TRUE	VAR5	ALK	Ornithine (4TMS)
M000608	A182003-101-xxx	NA	1805.4	TRUE	VAR5	ALK	Isocitric acid (4TMS)
M000835	A183001-111-xxx	NA	1815.45	PRED	VAR5	ALK	Acid (Amino)	Arginine [-NH3] (3TMS)
M000000	A184003-101-xxx	NA	1820.79	PRED	VAR5	ALK	NA
M000000	A184005-101-xxx	NA	1828.43	PRED	VAR5	ALK	NA
M000040	A189002-101-xxx	NA	1880.5	TRUE	VAR5	ALK	Glucose (1MEOX) (5TMS) MP
M000639	A189003-101-xxx	NA	1874.95	TRUE	VAR5	ALK	Galactonic acid-1,4-lactone (4TMS)
M000638	A189008-101-xxx	NA	1871.9	TRUE	VAR5	ALK	Gluconic acid-1,5-lactone (4TMS)
M000543	A190001-101-xxx	NA	1900.01	TRUE	VAR5	ALK	Nonadecane
M000000	A190021-101-xxx	NA	1907.43	TRUE	VAR5	ALK	NA
M000014	A192003-101-xxx	NA	1913.61	TRUE	VAR5	ALK	Lysine (4TMS)
M000055	A193001-101-xxx	NA	1919.43	TRUE	VAR5	ALK	Sorbitol (6TMS)
M000035	A194002-101-xxx	NA	1934.12	TRUE	VAR5	ALK	Tyrosine (3TMS)
M999999	A198006-101-xxx	NA	1959.24	TRUE	VAR5	ALK	Glucopyranose, D- (5TMS)
M000596	A199002-101-xxx	NA	1980.32	TRUE	VAR5	ALK	Galactonic acid (6TMS)
M000000	A203004-101-xxx	NA	2012.18	TRUE	VAR5	ALK	NA
M000483	A205001-101-xxx	NA	2046.19	TRUE	VAR5	ALK	Hexadecanoic acid (1TMS)
M001206	A209015-101-xxx	NA	2098.65	TRUE	VAR5	ALK	Taurine, N-tri(hydroxymethyl)methyl- (4TMS)
M000769	A211015-101-xxx	NA	2087.72	TRUE	VAR5	ALK	Ribulose-5-phosphate (1MEOX) (5TMS) BP
M000550	A220001-101-xxx	NA	2200	TRUE	VAR5	ALK	Docosane, n-
M000485	A225002-101-xxx	NA	2243.48	TRUE	VAR5	ALK	Octadecanoic acid (1TMS)
M000000	A231002-101-xxx	NA	2298.8	PRED	VAR5	ALK	similar to Glycerolaldopyranosid (6TMS)
M000510	A232002-101-xxx	NA	2292.48	TRUE	VAR5	ALK	Fructose-6-phosphate (1MEOX) (6TMS) MP
M000513	A233002-101-xxx	NA	2307.34	TRUE	VAR5	ALK	Glucose-6-phosphate (1MEOX) (6TMS) MP
M000077	A244001-101-xxx	NA	2417.35	TRUE	VAR5	ALK	Gluconic acid-6-phosphate (7TMS)
M000000	A260006-101-xxx	NA	2604.1	TRUE	VAR5	ALK	D260482
M000044	A264001-101-xxx	NA	2622.87	TRUE	VAR5	ALK	Sucrose (8TMS)
M000000	A273017-101-xxx	NA	2733.48	TRUE	VAR5	ALK	D273330
M000000	A278013-101-xxx	NA	2788.7	TRUE	VAR5	ALK	D278931
M000563	A280001-101-xxx	NA	2800.02	TRUE	VAR5	ALK	Octacosane, n-
M000000	A311002-101-xxx	NA	3098.96	PRED	VAR5	ALK	NA
M000000	A318004-101-xxx	NA	3171.26	PRED	VAR5	ALK	NA
M000567	A320001-101-xxx	NA	3199.99	TRUE	VAR5	ALK	Dotriacontane, n-
M000570	A360001-101-xxx	NA	3599.99	TRUE	VAR5	ALK	Hexatriacontane, n-
